# Supplementary material
Source: publisher site journal article supplement (https://www.dovepress.com/article/443557)

# **Causal relationship of obstructive sleep apnea with bone mineral density and the role of BMI**

## **List of Supplemental Materials**

**Table S1: Statistical power calculations for the results of OSA on BMD**

**Table S2. 5 SNPs represented genetically predicted OSA**

**Table S3: MR analysis results of OSA on BMD.**

**Table S4: Pleiotropy assessment for the results of OSA on BMD**

**Table S4: Statistical power calculations for the results of OSA on BMD**

**Figure S1. Scatter plots of estimates about obstructive sleep apnea on bone mineral density.**

**Figure S2. Leave-one-out plots of estimates about obstructive sleep apnea on bone mineral density.**

**Table S1: Statistical power calculations for the results of OSA on BMD**

| Exposure | Outcome                 | Instrumental variable | Sample size | R2 of exposure by genetic variants | Causal effect ( $\beta$ according to IVW) | Significance level | Power  |
|----------|-------------------------|-----------------------|-------------|------------------------------------|-------------------------------------------|--------------------|--------|
| OSA      | TB-BMD                  | 5                     | 217,955     | 0.09%                              | -0.053                                    | 0.05               | 11.20% |
| OSA      | TB-BMD (age 0–15)       | 5                     | 217,955     | 0.09%                              | 0.033                                     | 0.05               | 6.70%  |
| OSA      | TB-BMD (age 15–30)      | 5                     | 217,955     | 0.09%                              | 0.053                                     | 0.05               | 11.20% |
| OSA      | TB-BMD (age 30–45)      | 5                     | 217,955     | 0.09%                              | -0.080                                    | 0.05               | 20.10% |
| OSA      | TB-BMD (age 45–60)      | 5                     | 217,955     | 0.09%                              | -0.116                                    | 0.05               | 36.90% |
| OSA      | TB-BMD (age $\geq 60$ ) | 5                     | 217,955     | 0.09%                              | -0.069                                    | 0.05               | 16%    |
| OSA      | LS-BMD                  | 4                     | 217,955     | 0.09%                              | 0.079                                     | 0.05               | 19.70% |
| OSA      | FN-BMD                  | 4                     | 217,955     | 0.09%                              | -0.022                                    | 0.05               | 4.90%  |
| OSA      | FA-BMD                  | 4                     | 217,955     | 0.09%                              | 0.236                                     | 0.05               | 91.10% |
| OSA      | HBMD                    | 5                     | 217,955     | 0.09%                              | 0.097                                     | 0.05               | 27.40% |

OSA: Obstructive sleep apnea; TB-BMD: total body bone mineral density; LS-BMD: Lumbar spine bone mineral density; FN-BMD: Femoral neck bone mineral density; FA-BMD: Forearm bone mineral density; HBMD: Heel bone mineral density; IVW: inverse-variance weighted

**Table S2. 5 SNPs represented genetically predicted OSA**

| <b>SNP</b>  | <b>A1</b> | <b>A2</b> | <b>EAF</b> | <b>Beta</b> | <b>SE</b> | <b>P value</b> | <b>r2</b>  | <b>F-statistic</b> |
|-------------|-----------|-----------|------------|-------------|-----------|----------------|------------|--------------------|
| rs10928560  | T         | C         | 0.1949     | -0.0878     | 0.0158    | 2.80E-08       | 0.00014166 | 30.88              |
| rs4837016   | A         | G         | 0.4662     | -0.0706     | 0.0125    | 1.53E-08       | 0.00014634 | 31.90              |
| rs10507084  | T         | C         | 0.1793     | 0.1085      | 0.0163    | 2.80E-11       | 0.00020325 | 44.31              |
| rs9937053   | A         | G         | 0.4298     | 0.102       | 0.0125    | 4.32E-16       | 0.00030541 | 66.59              |
| rs142006783 | C         | T         | 0.0377     | 0.1783      | 0.0327    | 4.81E-08       | 0.00013639 | 29.73              |

SNP, single nucleotide polymorphism; A1, effect allele; A2, other allele; EAF, effect allele frequency; SE, standard error; OSA, obstructive sleep apnea;

**Table S3: MR analysis results of OSA on BMD.**

| Exposure | Outcome                | IVs | IVW                |                | MR-Egger           |                | Weighted Median    |                | Weighted Mode        |                |
|----------|------------------------|-----|--------------------|----------------|--------------------|----------------|--------------------|----------------|----------------------|----------------|
|          |                        |     | $\beta$ (95% CI)   | <i>P</i> value | $\beta$ (95% CI)   | <i>P</i> value | $\beta$ (95% CI)   | <i>P</i> value | $\beta$ (95% CI)     | <i>P</i> value |
| OSA      | TB-BMD                 | 5   | -0.05 (-0.13,0.03) | 0.187          | -0.05 (-0.54,0.43) | 0.841          | -0.09 (-0.19,0.01) | 0.072          | -0.11(-0.22,0.00)    | 0.133          |
| OSA      | TB-BMD (age 0–15)      | 5   | 0.03 (-0.13,0.20)  | 0.688          | 0.19 (-0.66,1.05)  | 0.690          | 0.00 (-0.20,0.20)  | 0.990          | -0.01 (-0.24,0.22)   | 0.917          |
| OSA      | TB-BMD (age 15–30)     | 5   | 0.05 (-0.28,0.38)  | 0.751          | -0.3 (-2.31,1.71)  | 0.788          | 0.05 (-0.36, 0.46) | 0.808          | -0.30 (-0.08,0.20)   | 0.305          |
| OSA      | TB-BMD (age 30–45)     | 5   | -0.08 (-0.25,0.19) | 0.554          | -0.61 (-2.04,0.83) | 0.469          | -0.10 (-0.34,0.14) | 0.434          | -0.07 (-0.31,0.17)   | 0.597          |
| OSA      | TB-BMD (age 45–60)     | 5   | -0.12 (-0.27,0.04) | 0.147          | -0.12 (-1.05,0.82) | 0.819          | -0.17 (-0.35,0.02) | 0.078          | -0.21 (-0.40, -0.01) | 0.105          |
| OSA      | TB-BMD (age $\geq$ 60) | 5   | -0.07 (-0.19,0.06) | 0.280          | 0.14 (-0.53,0.82)  | 0.710          | -0.08 (-0.22,0.06) | 0.281          | -0.08 (-0.24,0.08)   | 0.396          |
| OSA      | LS-BMD                 | 4   | 0.08 (-0.08,0.24)  | 0.337          | 0.40 (-0.39,1.19)  | 0.429          | 0.08 (-0.10,0.26)  | 0.380          | 0.07 (-0.13,0.27)    | 0.551          |
| OSA      | FN-BMD                 | 4   | -0.02 (-0.21,0.16) | 0.813          | 0.15 (-0.85,1.15)  | 0.796          | 0.00 (-0.17,0.17)  | 0.999          | -0.01 (-0.23,0.21)   | 0.938          |
| OSA      | FA-BMD                 | 4   | 0.26 (0.06,0.41)   | 0.009          | -0.32 (-1.39,0.75) | 0.619          | 0.22 (0.03,0.40)   | 0.023          | 0.27 (0.06,0.48)     | 0.084          |
| OSA      | HBMD                   | 5   | 0.10 (0.02,0.18)   | 0.018          | 0.07 (-0.43,0.57)  | 0.791          | 0.07 (0.01,0.13)   | 0.041          | 0.01(-0.16,0.17)     | 0.946          |

OSA: Obstructive sleep apnea; TB-BMD: total body bone mineral density; LS-BMD: Lumbar spine bone mineral density; FN-BMD: Femoral neck bone mineral density; FA-BMD: Forearm bone mineral density; HBMD: Heel bone mineral density; IVs: Instrumental variable; CI: Confidence Interval.

**Table S4: Pleiotropy assessment for the results of OSA on BMD**

| Exposure | Outcome            | MR-PRESSO global test |         | MR-Egger intercept |         | Cochrane's Q test |         |
|----------|--------------------|-----------------------|---------|--------------------|---------|-------------------|---------|
|          |                    | Observed RSS          | P value | Effect size        | P value | Q' test           | P value |
| OSA      | TB-BMD             | 8.98                  | 0.328   | 0.000              | 1.000   | 4.62              | 0.330   |
| OSA      | TB-BMD (age 0–15)  | 2.91                  | 0.766   | -0.015             | 0.736   | 2.05              | 0.727   |
| OSA      | TB-BMD (age 15–30) | 11.36                 | 0.278   | 0.033              | 0.749   | 5.19              | 0.268   |
| OSA      | TB-BMD (age 30–45) | 8.87                  | 0.253   | 0.049              | 0.517   | 7.45              | 0.114   |
| OSA      | TB-BMD (age 45–60) | 0.72                  | 0.310   | 0.000              | 0.994   | 4.79              | 0.310   |
| OSA      | TB-BMD (age ≥60)   | 1.02                  | 0.969   | -0.019             | 0.579   | 0.87              | 0.929   |
| OSA      | LS-BMD             | 5.54                  | 0.452   | -0.028             | 0.505   | 3.62              | 0.307   |
| OSA      | FN-BMD             | 11.60                 | 0.219   | -0.015             | 0.762   | 6.26              | 0.100   |
| OSA      | FA-BMD             | 7.89                  | 0.316   | 0.051              | 0.412   | 4.98              | 0.173   |
| OSA      | HBMD               | 31.59                 | 0.069   | 0.002              | 0.931   | 15.09             | 0.005   |

OSA: Obstructive sleep apnea; TB-BMD: total body bone mineral density; LS-BMD: Lumbar spine bone mineral density; FN-BMD: Femoral neck bone mineral density; FA-BMD: Forearm bone mineral density; HBMD: Heel bone mineral density;

**Figure S1.** Scatter plots of estimates about obstructive sleep apnea on bone mineral density. A. Scatter plots of estimates about OSA on TB-BMD; B. Scatter plots of estimates about OSA on TB-BMD (age 0–15); C. Scatter plots of estimates about OSA on TB-BMD (age 15–30); D. Scatter plots of estimates about OSA on TB-BMD (age 30–45); E. Scatter plots of estimates about OSA on TB-BMD (age 45–60); F. Scatter plots of estimates about OSA on TB-BMD (age ≥60); G. Scatter plots of estimates about OSA on LS-BMD; H. Scatter plots of estimates about OSA on FN-BMD; I. Scatter plots of estimates about OSA on FA-BMD; J. OSA on HBMD.

Abbreviation: OSA: Obstructive sleep apnea; TB-BMD: total body bone mineral density; LS-BMD: Lumbar spine bone mineral density; FN-BMD: Femoral neck bone mineral density; FA-BMD: Forearm bone mineral density; HBMD: Heel bone mineral density.

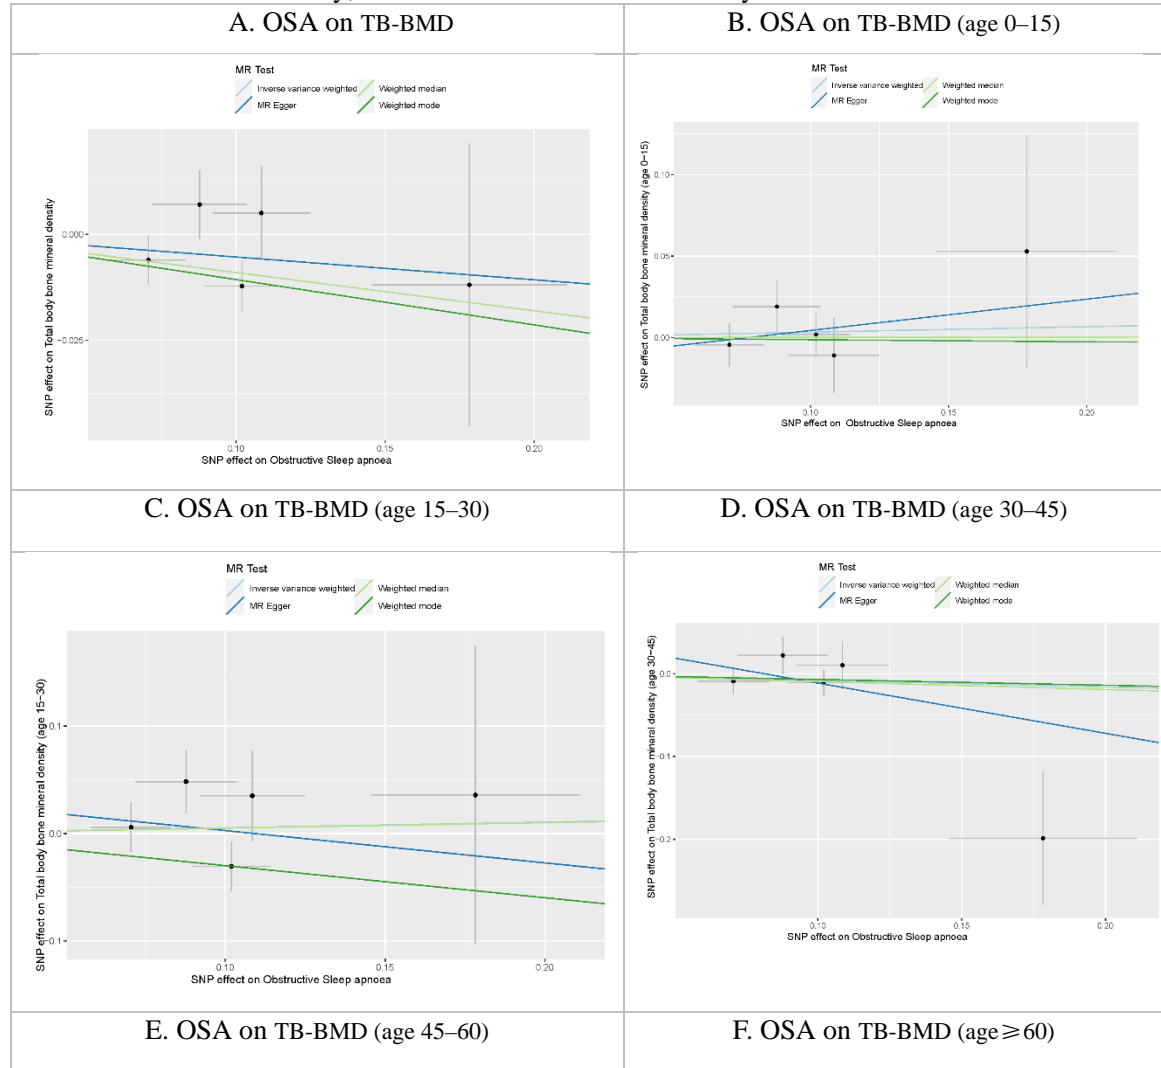

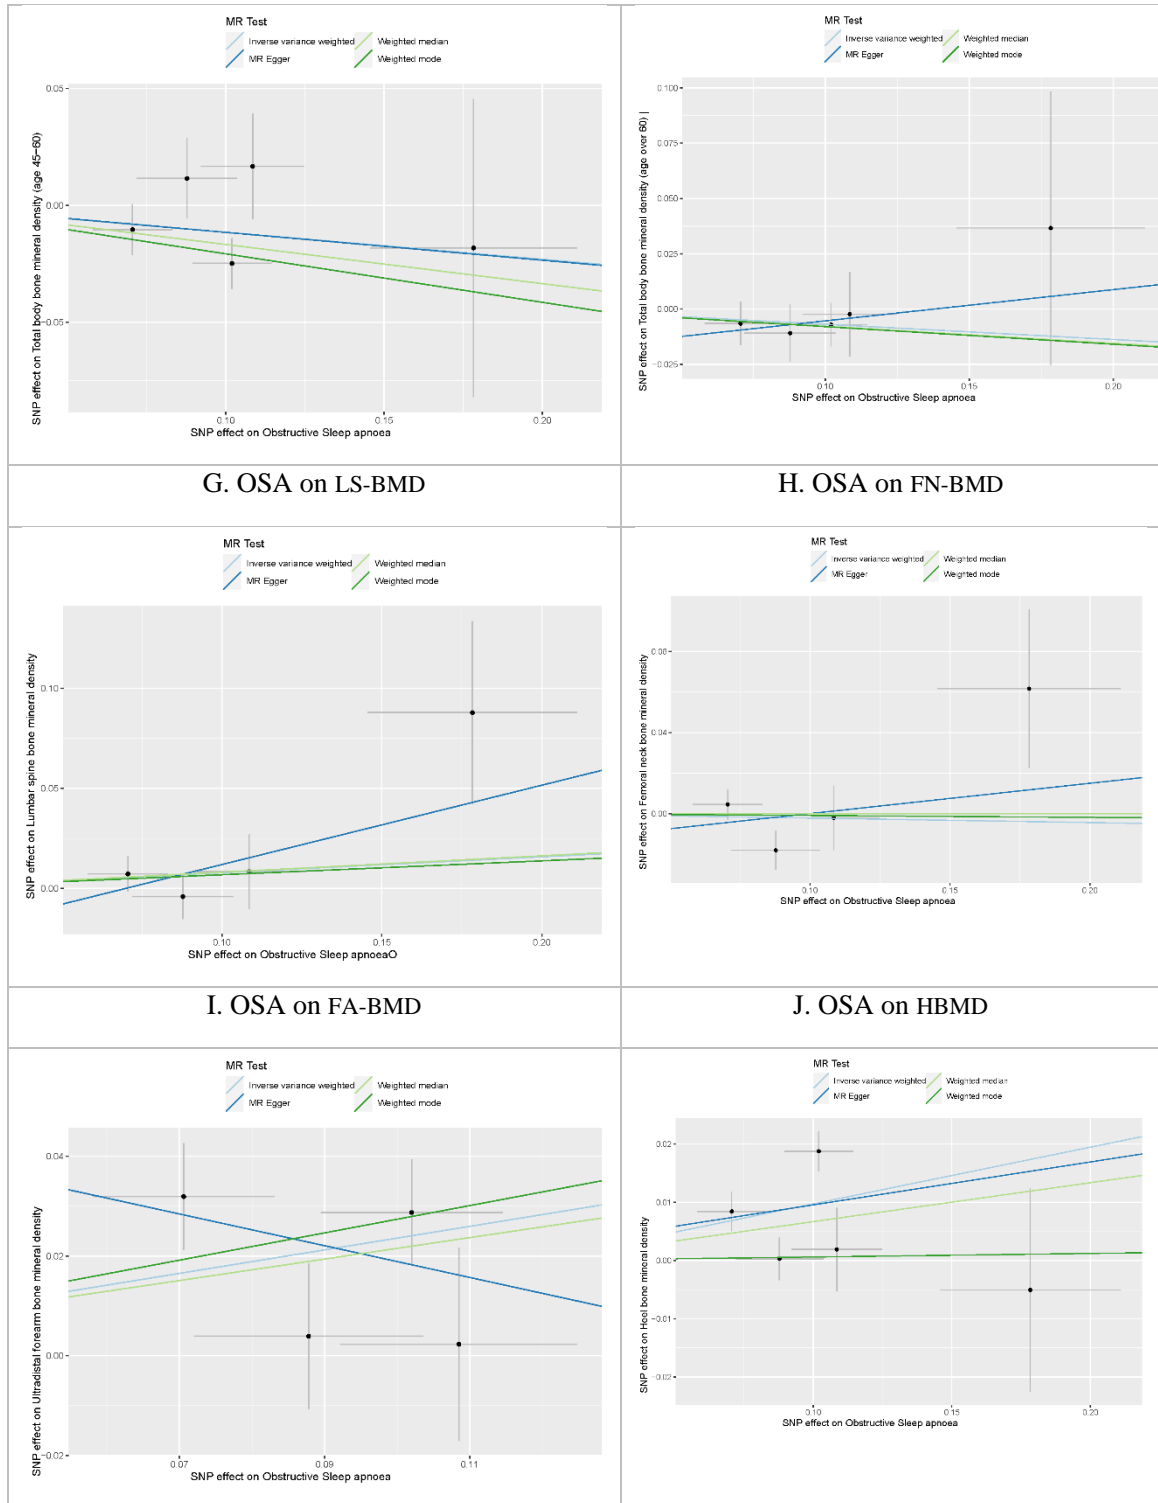

**Figure S2.** Leave-one-out plots of estimates about obstructive sleep apnoea on bone mineral density. A. Leave-one-out plots of estimates about OSA on TB-BMD; B. Leave-one-out plots of estimates about OSA on TB-BMD (age 0–15); C. Leave-one-out plots of estimates about OSA on TB-BMD (age 15–30); D. Leave-one-out plots of estimates about OSA on TB-BMD (age 30–45); E. Leave-one-out plots of estimates about OSA on TB-BMD (age 45–60); F. Leave-one-out plots of estimates about OSA on TB-BMD (age  $\geq 60$ ); G. Leave-one-out plots of estimates about OSA on LS-BMD; H. Leave-one-out plots of estimates about OSA on FN-BMD; I. Leave-one-out plots of estimates about OSA on FA-BMD; J. OSA on HBMD.

Abbreviation: OSA: Obstructive sleep apnea; TB-BMD: total body bone mineral density; LS-BMD: Lumbar spine bone mineral density; FN-BMD: Femoral neck bone mineral density; FA-BMD: Forearm bone mineral density; HBMD: Heel bone mineral density.

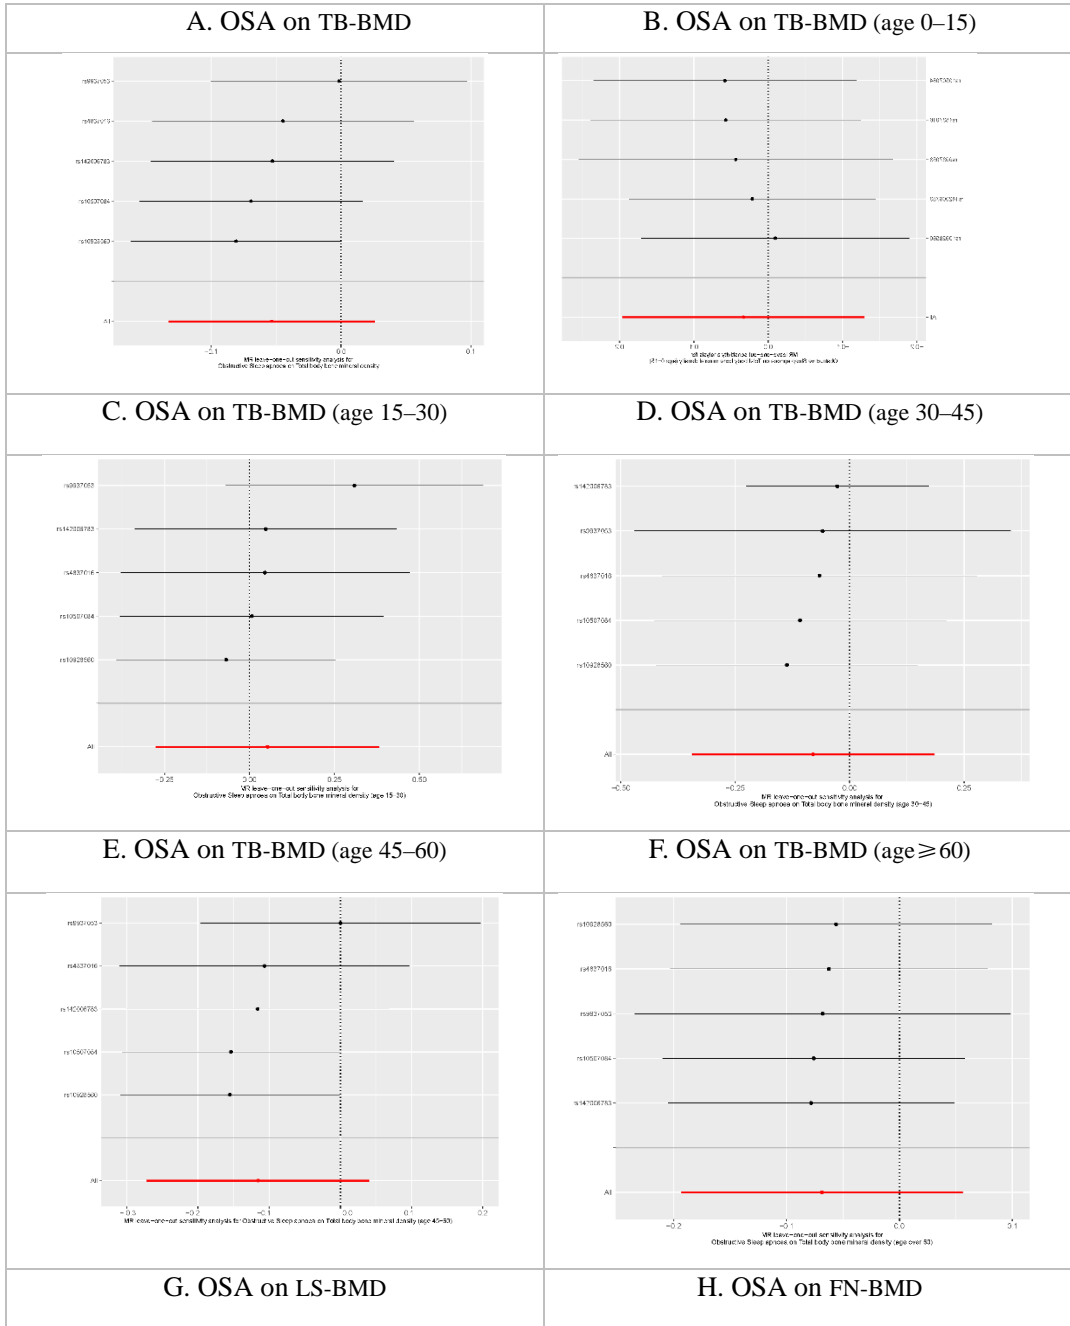



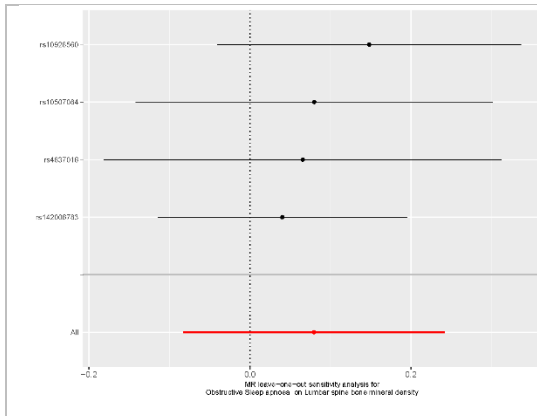

I. OSA on FA-BMD

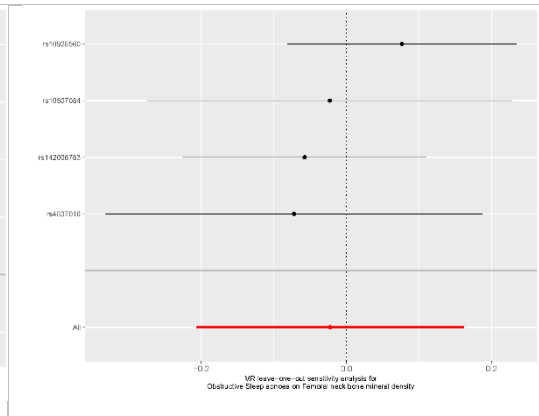

J. OSA on HBMD

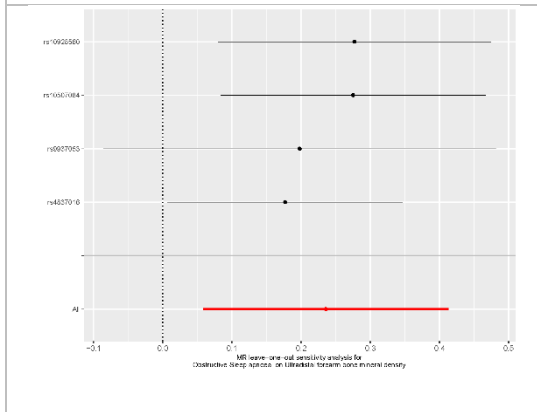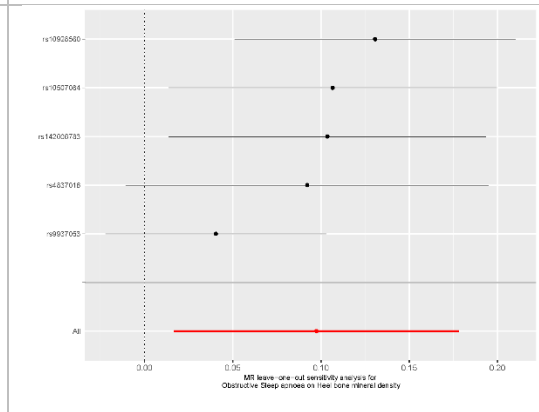

Supplement: Supplementary file 1 [file get_supplementary_file.php]
